# Supplementary material for: An Evaluation of Alternatives for Providing Care to Veterans
Source: Preprints.org preprint supplement (doi:10.20944/preprints201806.0363.v1), 2018-06-22
Supplement: Supplementary file 1 [file supplementary]

**Declaration of Conflict of Interest**

These authors have no conflicts of interest other than both have dual eligibility for care from the VHA and TRICARE.
